# Supplementary material for: Gut Microbiota Profile and Its Association with Clinical Variables and Dietary Intake in Overweight/Obese and Lean Subjects: A Cross-Sectional Study
Source: MDPI journal article supplement (doi:10.3390/nu13062032), 2021-06-13
Supplement: s1 [file s1]

**Supplementary Table 1.** Significant differences between Overweight/Obese and Lean groups in the relative abundance of ASVs that present LDA score > 2.5 in LefSe analysis.

| ASV                                        | LDA score | P-value    | Taxonomy                                                                                                                      |
|--------------------------------------------|-----------|------------|-------------------------------------------------------------------------------------------------------------------------------|
| <b>Increased in Overweight/Obese Group</b> |           |            |                                                                                                                               |
| ASV-0009                                   | 3.7010    | 3.0382e-07 | p__Actinobacteria;c__Coriobacteriia;o__Coriobacteriales;f__Coriobacteriaceae;g__Collinsella;s__aerofaciens                    |
| ASV-0010                                   | 3.6686    | 2.4853e-09 | k__Bacteria;p__Firmicutes;c__Clostridia;o__Clostridiales;f__Lachnospiraceae;g__Dorea;s__longicatena                           |
| ASV-0048                                   | 3.5504    | 0.0009     | k__Bacteria;p__Bacteroidetes;c__Bacteroidia;o__Bacteroidales;f__Bacteroidaceae;g__Bacteroides;s__pl                           |
| ASV_0007                                   | 3.5402    | 0.0139     | k__Bacteria;p__Firmicutes;c__Clostridia;o__Clostridiales;f__Ruminococcaceae;g__Faecalibacterium;s__NA                         |
| ASV-0011                                   | 3.5393    | 0.0041     | p__Firmicutes;c__Clostridia;o__Clostridiales;f__Ruminococcaceae;g__Subdoligranulum;s__NA                                      |
| ASV-0017                                   | 3.4943    | 0.0100     | k__Bacteria;p__Actinobacteria;c__Actinobacteria;o__Bifidobacteriales;f__Bifidobacteriaceae;g__Bifidobacterium;s__NA           |
| ASV-0034                                   | 3.4552    | 0.0109     | k__Bacteria;p__Bacteroidetes;c__Bacteroidia;o__Bacteroidales;f__Prevotellaceae;g__Prevotellaceae_NK3B31_group;s__NA           |
| ASV-0027                                   | 3.3948    | 7.9115e-05 | p__Firmicutes;c__Clostridia;o__Clostridiales;f__Lachnospiraceae;g__Fusicatenibacter;s__saccharivorans                         |
| ASV-0013                                   | 3.3540    | 0.0393     | p__Firmicutes;c__Clostridia;o__Clostridiales;f__Ruminococcaceae;g__Subdoligranulum;s__variabile                               |
| ASV-0053                                   | 3.2178    | 1.8499e-05 | p__Firmicutes;c__Clostridia;o__Clostridiales;f__Lachnospiraceae;g__Lachnospiraceae_ND3007_group;s__NA                         |
| ASV-0032                                   | 3.1956    | 0.0001     | p__Firmicutes;c__Clostridia;o__Clostridiales;f__Lachnospiraceae;g__Coprococcus_3;s__comes                                     |
| ASV-0063                                   | 3.1718    | 6.6223e-05 | p__Firmicutes;c__Clostridia;o__Clostridiales;f__Lachnospiraceae;g__NA;s__NA                                                   |
| ASV-0014                                   | 3.1230    | 0.0178     | p__Firmicutes;c__Clostridia;o__Clostridiales;f__Lachnospiraceae;g__Agathobacter;s__NA                                         |
| ASV-0086                                   | 3.0490    | 5.1063e-06 | p__Firmicutes;c__Clostridia;o__Clostridiales;f__Lachnospiraceae;g__Blautia;s__massiliensis                                    |
| ASV-0065                                   | 2.9363    | 0.0011     | p__Firmicutes;c__Clostridia;o__Clostridiales;f__Lachnospiraceae;g__Blautia;s__faecis                                          |
| ASV-0066                                   | 2.9214    | 0.0002     | p__Firmicutes;c__Clostridia;o__Clostridiales;f__Lachnospiraceae;g__Dorea;s__formicigenerans                                   |
| ASV-0180                                   | 2.9176    | 0.0046     | k__Bacteria;p__Bacteroidetes;c__Bacteroidia;o__Bacteroidales;f__Bacteroidaceae;g__Bacteroides;s__pl                           |
| ASV-0067                                   | 2.9152    | 0.0003     | k__Bacteria;p__Bacteroidetes;c__Bacteroidia;o__Bacteroidales;f__Bacteroidaceae;g__Bacteroides;s__pl                           |
| ASV-0127                                   | 2.9128    | 0.0001     | p__Firmicutes;c__Clostridia;o__Clostridiales;f__Lachnospiraceae;g__NA;s__NA                                                   |
| ASV-0062                                   | 2.9014    | 0.0154     | p__Firmicutes;c__Clostridia;o__Clostridiales;f__Peptostreptococcaceae;g__Romboutsia;s__NA                                     |
| ASV-0115                                   | 2.8851    | 0.0015     | k__Bacteria;p__Bacteroidetes;c__Bacteroidia;o__Bacteroidales;f__Bacteroidaceae;g__Bacteroides;s__co                           |
| ASV-0197                                   | 2.8563    | 0.0009     | procola                                                                                                                       |
| ASV-0125                                   | 2.8216    | 1.3212e-05 | p__Euryarchaeota;c__Methanobacteria;o__Methanobacteriales;f__Methanobacteriaceae;g__Methanobrevibacter;s__NA                  |
| ASV-0073                                   | 2.7978    | 0.011      | p__Firmicutes;c__Clostridia;o__Clostridiales;f__Clostridiaceae_1;g__Clostridium_sensu_stricto_1;s__NA                         |
| ASV-0263                                   | 2.7777    | 0.037      | p__Firmicutes;c__Clostridia;o__Clostridiales;f__Lachnospiraceae;g__Agathobacter;s__NA                                         |
| ASV-0149                                   | 2.7351    | 0.0002     | p__Firmicutes;c__Clostridia;o__Clostridiales;f__Lachnospiraceae;g__Blautia;s__NA                                              |
| ASV-0272                                   | 2.6877    | 0.0057     | k__Bacteria;p__Firmicutes;c__Negativicutes;o__Selenomonadales;f__Acidaminococcaceae;g__Phascolarctobacterium;s__succinatutens |
| ASV-0175                                   | 2.6862    | 0.0002     | p__Firmicutes;c__Clostridia;o__Clostridiales;f__Ruminococcaceae;g__Ruminiclostridium_5;s__NA                                  |
| ASV-0163                                   | 2.6118    | 0.0073     | k__Bacteria;p__Firmicutes;c__Clostridia;o__Clostridiales;f__Clostridiaceae_1;g__Clostridium_sensu_stricto_1;s__NA             |
| ASV-0189                                   | 2.5825    | 0.0070     | k__Bacteria;p__Firmicutes;c__Clostridia;o__Clostridiales;f__Ruminococcaceae;g__Negativibacillus;s__NA                         |
| ASV-0247                                   | 2.5788    | 0.0020     | k__Bacteria;p__Firmicutes;c__Clostridia;o__Clostridiales;f__Lachnospiraceae;g__NA;s__NA                                       |
| ASV-0112                                   | 2.5572    | 0.0137     | k__Bacteria;p__Firmicutes;c__Clostridia;o__Clostridiales;f__Lachnospiraceae;g__CAG-56;s__NA                                   |
|                                            |           |            | k__Bacteria;p__Actinobacteria;c__Coriobacteriia;o__Coriobacteriales;f__Eggerthellaceae;g__NA;s__NA                            |
|                                            |           |            | k__Bacteria;p__Firmicutes;c__Clostridia;o__Clostridiales;f__Ruminococcaceae;g__Ruminococcus_2;s__NA                           |

| ASV                            | LDA score | P-value | Taxonomy                                                                                                           |
|--------------------------------|-----------|---------|--------------------------------------------------------------------------------------------------------------------|
| <b>Increased in Lean Group</b> |           |         |                                                                                                                    |
| ASV-0024                       | 3.7464    | 0.0463  | k__Bacteria;p__Firmicutes;c__Clostridia;o__Clostridiales;f__Ruminococcaceae;g__Faecalibacterium;s__prausnitzii     |
| ASV-0037                       | 3.5586    | 0.0120  | p__Firmicutes;c__Clostridia;o__Clostridiales;f__Lachnospiraceae;g__Lachnospiraceae_NK4A136_group;s__NA             |
| ASV-0122                       | 3.2856    | 0.0017  | k__Bacteria;p__Bacteroidetes;c__Bacteroidia;o__Bacteroidales;f__Prevotellaceae;g__Prevotella_9;s__NA               |
| ASV-0069                       | 3.2612    | 0.0035  | p__Firmicutes;c__Clostridia;o__Clostridiales;f__Christensenellaceae;g__Christensenellaceae_R-7_group;s__NA         |
| ASV-0095                       | 3.2187    | 0.0039  | p__Firmicutes;c__Clostridia;o__Clostridiales;f__Lachnospiraceae;g__Lachnospira;s__pectinoschiza                    |
| ASV-0042                       | 3.1557    | 0.0139  | k__Bacteria;p__Firmicutes;c__Clostridia;o__Clostridiales;f__Lachnospiraceae;g__Lachnospira;s__NA                   |
| ASV-0068                       | 3.1239    | 0.0244  | p__Firmicutes;c__Clostridia;o__Clostridiales;f__Lachnospiraceae;g__Lachnospiraceae_NK4A136_group;s__NA             |
| ASV-0120                       | 3.1169    | 0.0007  | p__Firmicutes;c__Clostridia;o__Clostridiales;f__Lachnospiraceae;g__Roseburia;s__NA                                 |
| ASV-0030                       | 3.0980    | 0.0447  | p__Firmicutes;c__Clostridia;o__Clostridiales;f__Ruminococcaceae;g__Ruminococcaceae_UCG-002;s__NA                   |
| ASV-0090                       | 2.9625    | 0.0124  | p__Bacteroidetes;c__Bacteroidia;o__Bacteroidales;f__Bacteroidaceae;g__Bacteroides;s__NA                            |
| ASV-0148                       | 2.9346    | 0.0003  | p__Firmicutes;c__Clostridia;o__Clostridiales;f__Lachnospiraceae;g__NA;s__NA                                        |
| ASV-0202                       | 2.9245    | 0.0009  | p__Bacteroidetes;c__Bacteroidia;o__Bacteroidales;f__Bacteroidaceae;g__Bacteroides;s__NA                            |
| ASV-0168                       | 2.9224    | 0.0188  | p__Firmicutes;c__Clostridia;o__Clostridiales;f__Lachnospiraceae;g__Lachnospiraceae_UCG-001;s__NA                   |
| ASV-0250                       | 2.9157    | 0.0015  | k__Bacteria;p__Bacteroidetes;c__Bacteroidia;o__Bacteroidales;f__Prevotellaceae;g__Prevotella_9;s__NA               |
| ASV-0249                       | 2.9084    | 0.0463  | k__Bacteria;p__Bacteroidetes;c__Bacteroidia;o__Bacteroidales;f__Prevotellaceae;g__Alloprevotella;s__NA             |
| ASV-0132                       | 2.9080    | 0.0003  | p__Firmicutes;c__Clostridia;o__Clostridiales;f__Lachnospiraceae;g__Roseburia;s__hominis                            |
| ASV-0229                       | 2.9034    | 0.0213  | k__Bacteria;p__Tenericutes;c__Mollicutes;o__Anaeroplasmatales;f__Anaeroplasmataceae;g__Anaeroplasmataceae;s__NA    |
| ASV-0105                       | 2.8317    | 0.0445  | k__Bacteria;p__Firmicutes;c__Clostridia;o__Clostridiales;f__Lachnospiraceae;g__Coprococcus_2;s__NA                 |
| ASV-0385                       | 2.7632    | 0.0099  | k__Bacteria;p__Bacteroidetes;c__Bacteroidia;o__Bacteroidales;f__Prevotellaceae;g__Prevotella_9;s__NA               |
| ASV-0987                       | 2.7305    | 0.0099  | k__Bacteria;p__Bacteroidetes;c__Bacteroidia;o__Bacteroidales;f__Bacteroidaceae;g__Bacteroides;s__NA                |
| ASV-0195                       | 2.7287    | 0.0403  | k__Bacteria;p__Bacteroidetes;c__Bacteroidia;o__Bacteroidales;f__Bacteroidaceae;g__Bacteroides;s__cacaecae          |
| ASV-0217                       | 2.7060    | 0.0360  | p__Bacteroidetes;c__Bacteroidia;o__Bacteroidales;f__Bacteroidaceae;g__Bacteroides;s__NA                            |
| ASV-0190                       | 2.7042    | 0.0001  | p__Bacteroidetes;c__Bacteroidia;o__Bacteroidales;f__Marinifilaceae;g__Odoribacter;s__splanchnicus                  |
| ASV-0206                       | 2.6492    | 0.0286  | k__Bacteria;p__Bacteroidetes;c__Bacteroidia;o__Bacteroidales;f__Marinifilaceae;g__Odoribacter;s__splanchnicus      |
| ASV-0459                       | 2.6381    | 0.0015  | k__Bacteria;p__Bacteroidetes;c__Bacteroidia;o__Bacteroidales;f__Prevotellaceae;g__Alloprevotella;s__NA             |
| ASV-0344                       | 2.6365    | 0.0131  | k__Bacteria;p__Firmicutes;c__Clostridia;o__Clostridiales;f__Lachnospiraceae;g__Lachnospiraceae_NK4A136_group;s__NA |
| ASV-0466                       | 2.5738    | 0.0099  | k__Bacteria;p__Firmicutes;c__Negativicutes;o__Selenomonadales;f__Veillonellaceae;g__Anaerovibrio;s__NA             |
| ASV-0420                       | 2.5711    | 0.0216  | k__Bacteria;p__Bacteroidetes;c__Bacteroidia;o__Bacteroidales;f__Tannerellaceae;g__Parabacteroides;s__distasonis    |
| ASV-0375                       | 2.5255    | 0.0213  | k__Bacteria;p__Firmicutes;c__Clostridia;o__Clostridiales;f__Lachnospiraceae;g__Agathobacter;s__NA                  |
| ASV-0754                       | 2.5250    | 0.0128  | k__Bacteria;p__Firmicutes;c__Clostridia;o__Clostridiales;f__Ruminococcaceae;g__Ruminococcaceae_UCG-010;s__NA       |
| ASV-0273                       | 2.5197    | 0.0096  | p__Firmicutes;c__Clostridia;o__Clostridiales;f__Lachnospiraceae;g__NA;s__NA                                        |

LDA, linear discriminant analysis; o, obese, L, lean; ASV, amplicon sequence variant.  
P-value <0.05 was considered statistically significant.
